# Supplementary material for: Comprehensive analysis of circRNA expression pattern and circRNA-miRNA-mRNA network in the pathogenesis of atherosclerosis in rabbits
Source: publisher site journal article supplement (doi:10.18632/aging.101541), 2018-09-06
Supplement: Supplementary file [file aging-v10i9-101541-supplementary-material-SD6.pdf]

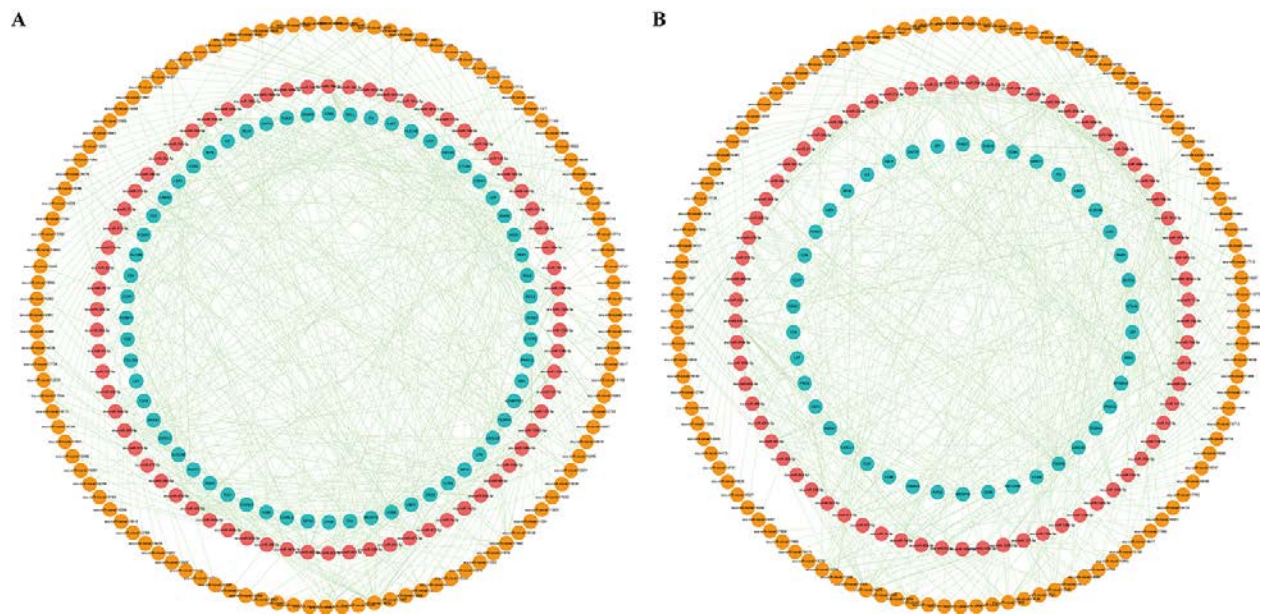

**Supplementary Figure S2. The sub-network of DEcircRNA-DEmiRNA-DEmRNA triple network. (A)** Cell adhesion sub-network. **(B)** Cell activation sub-network. The blue nodes represented mRNA, the red nodes represented miRNAs, and the orange nodes represented circRNAs.
